# Supplementary material
Source: PubMed Central journal article supplement (PMC1637554)

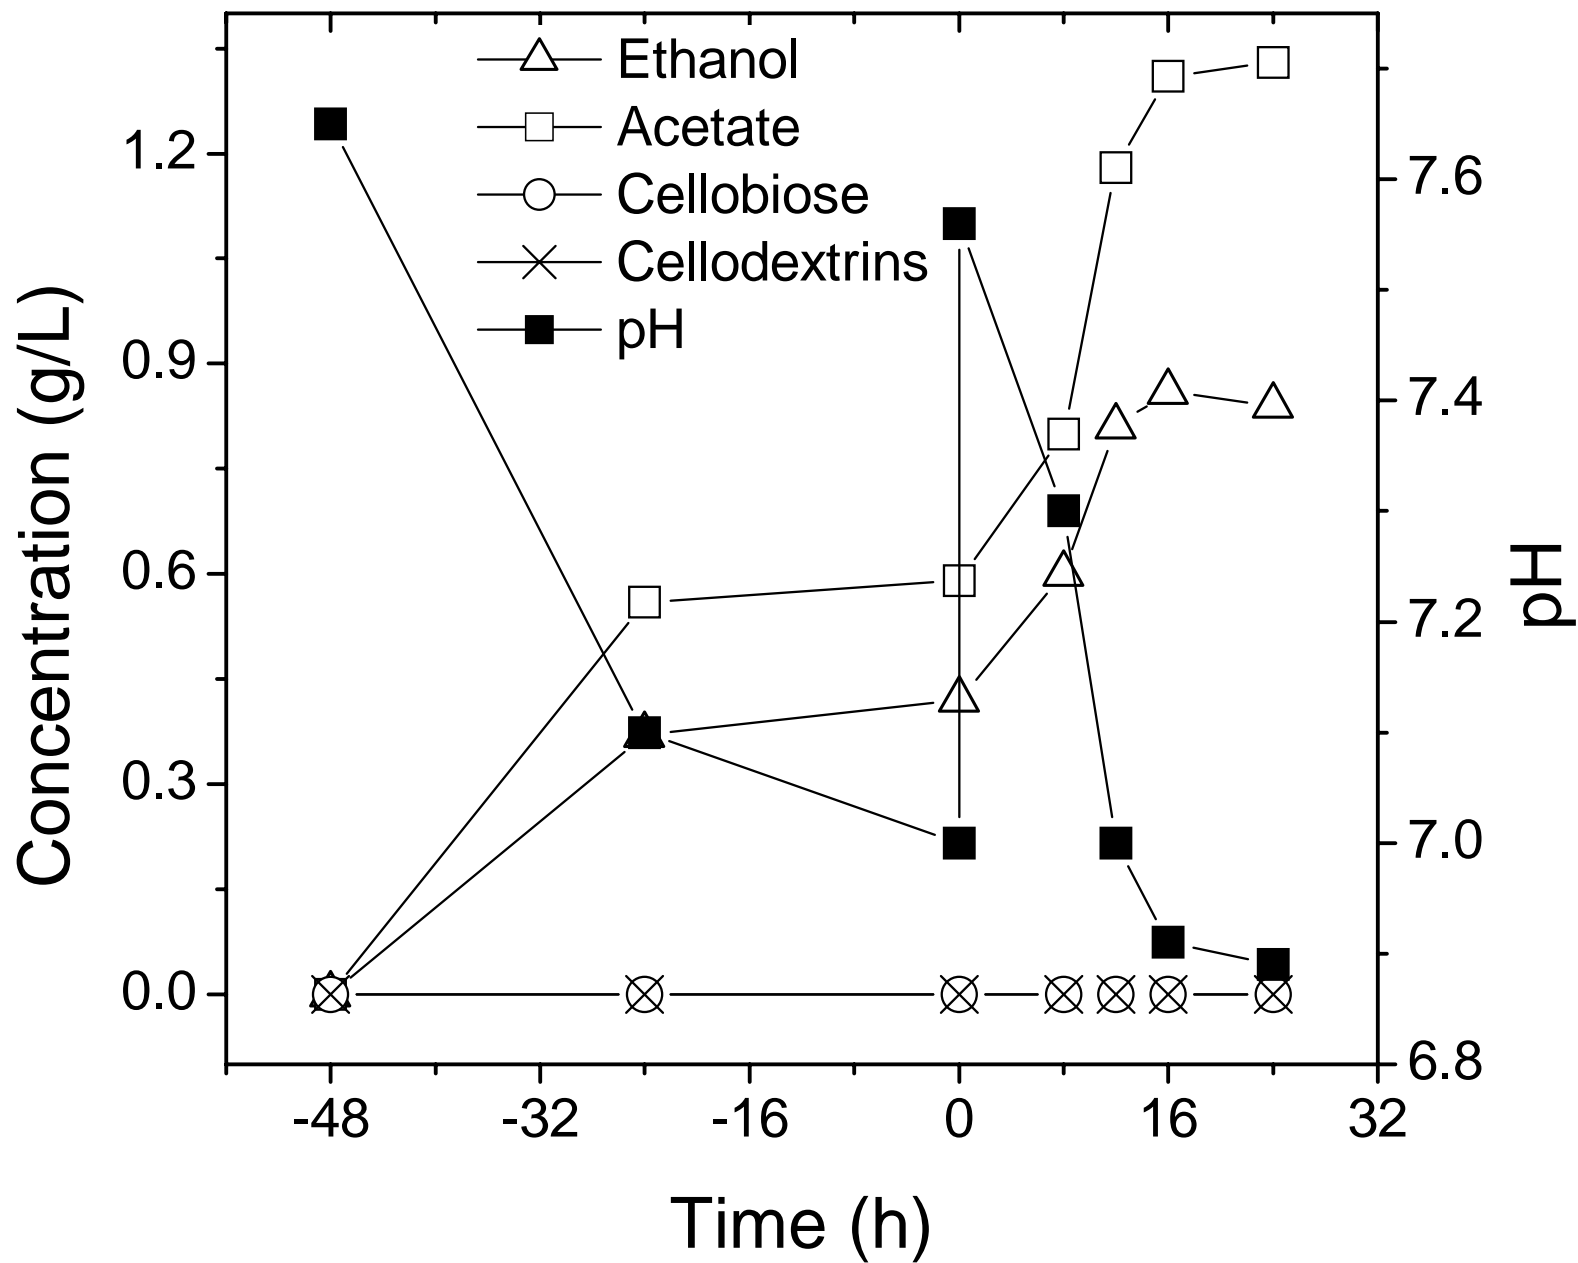

Fig 4

Supplement: pnas_0605381103_1.pdf [file pnas_0605381103_1.pdf]

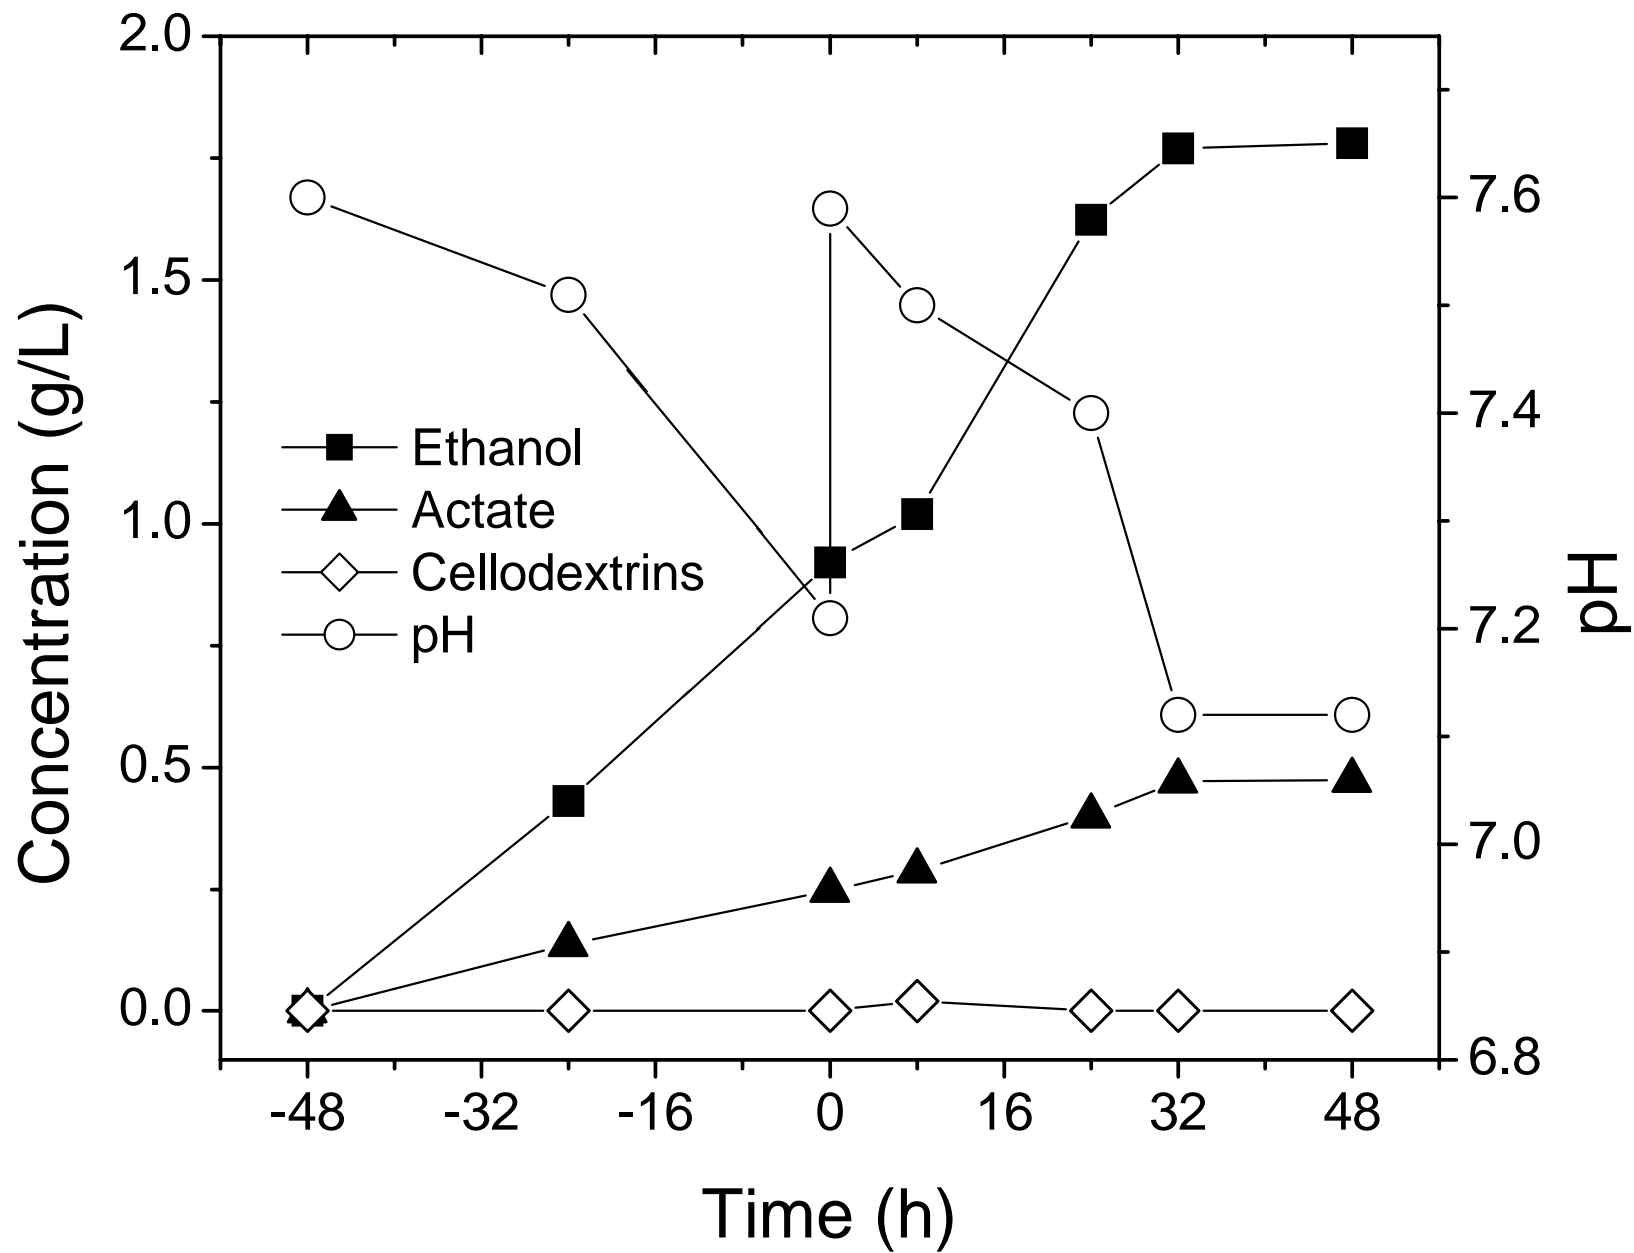

Fig 5

Supplement: pnas_0605381103_2.pdf [file pnas_0605381103_2.pdf]

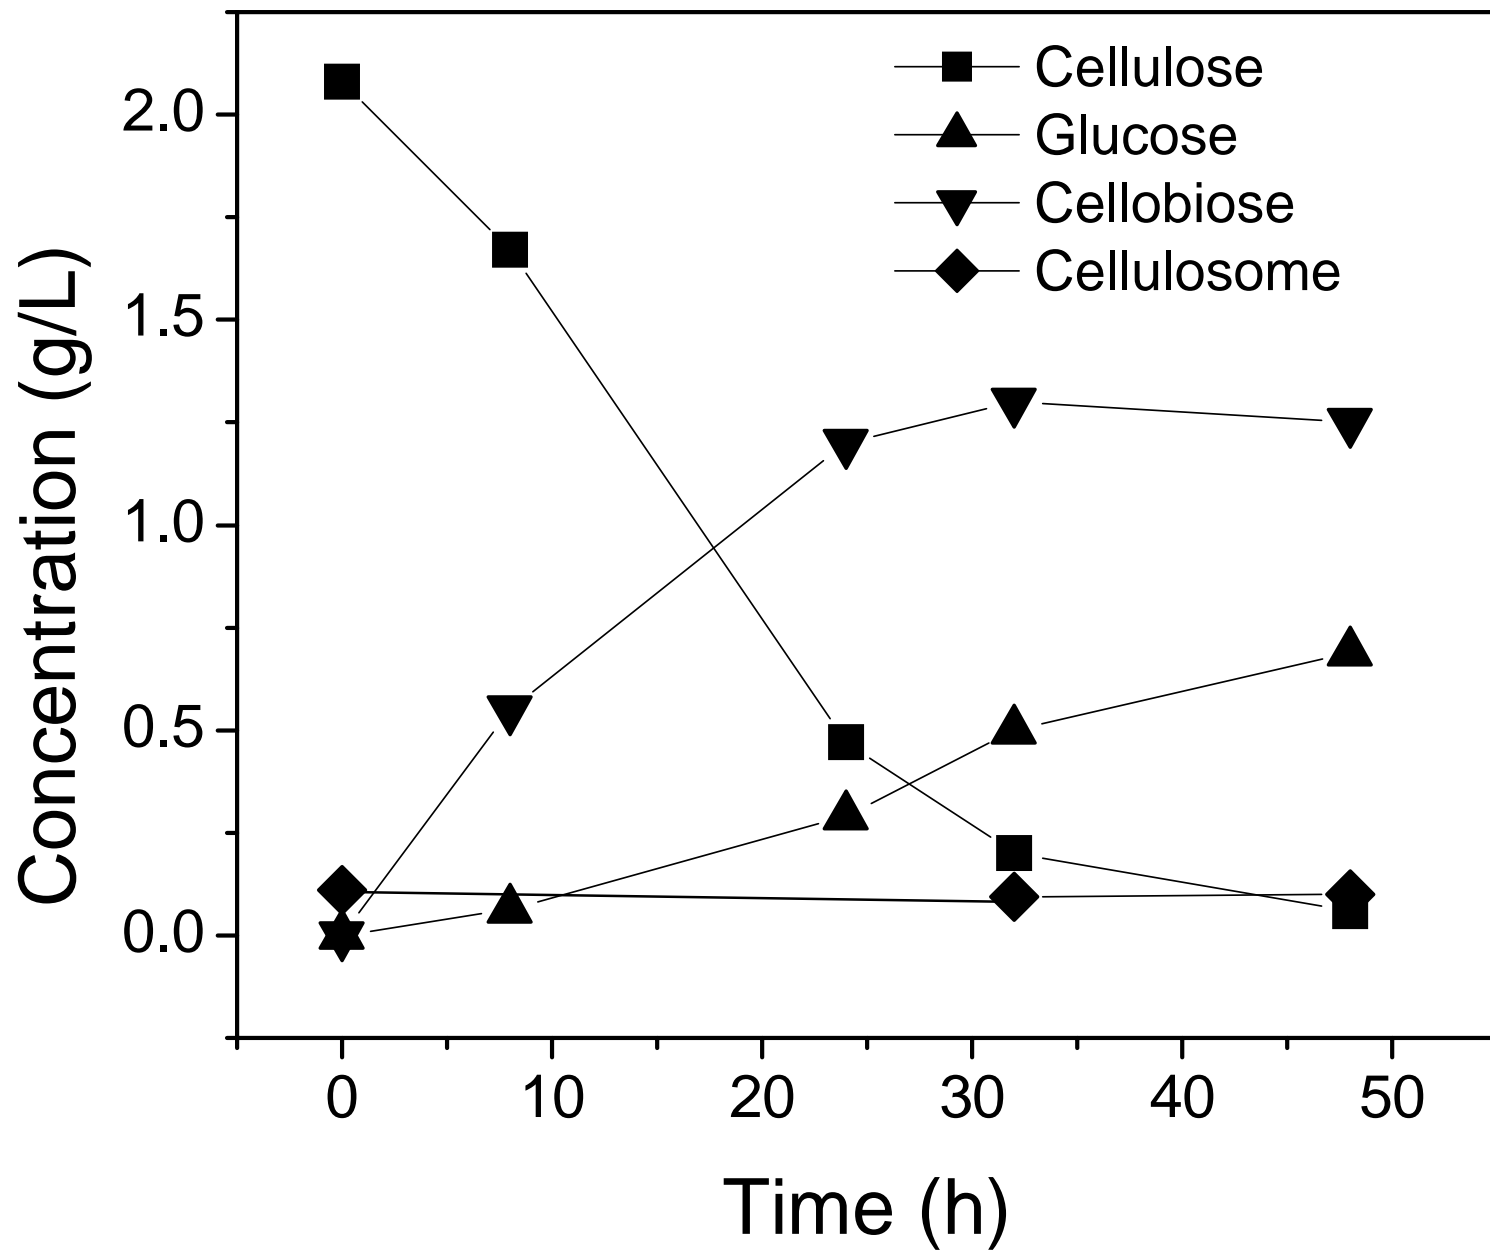

Fig 6

Supplement: pnas_0605381103_3.pdf [file pnas_0605381103_3.pdf]

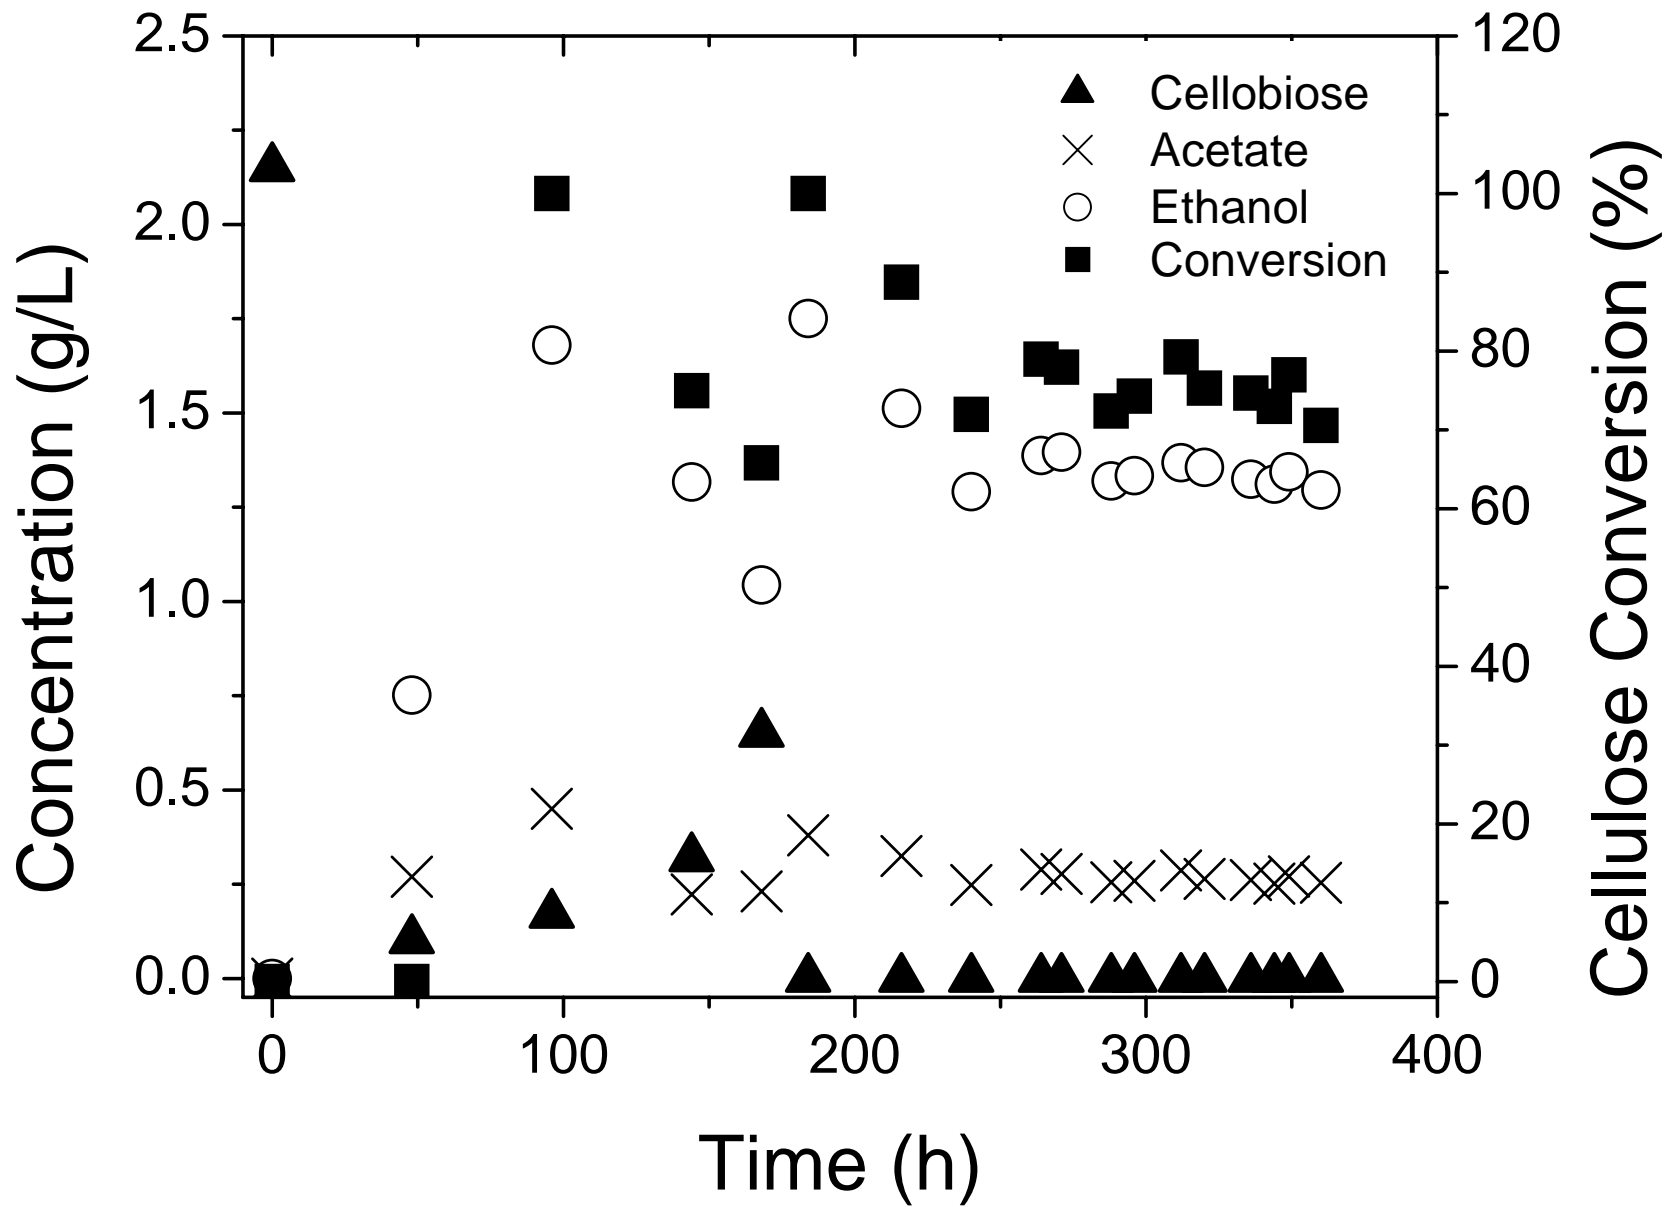

Fig 7

Supplement: pnas_0605381103_4.pdf [file pnas_0605381103_4.pdf]

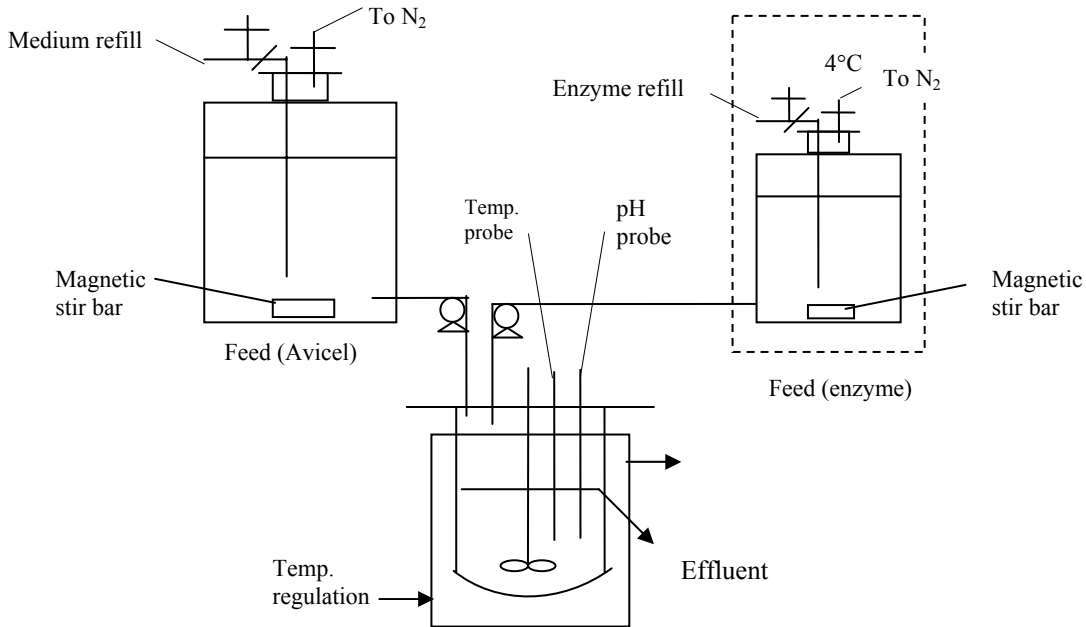

Supplement: pnas_0605381103_5.pdf [file pnas_0605381103_5.pdf]
